# Supplementary material for: Solithromycin inhibits IL-13-induced goblet cell hyperplasia and MUC5AC, CLCA1, and ANO1 in human bronchial epithelial cells
Source: PeerJ. 2023 Jan 17;11:e14695. doi: 10.7717/peerj.14695 (PMC9854378; doi:10.7717/peerj.14695)
Supplement: Supplemental Information 2 [file peerj-11-14695-s002.xlsx]

## Sheet: RTPCR
RTPCR
20160909		cDNA合成			MIX
BIO-RAD					40		25℃ 5min
iScript cDNA Synthesis Kit		5XReactionMix		4	160		42℃ 30min
		ReveerseTrams		1	40		85℃ 5min
		Template		4			4℃ ∞
		NucleasefreeH2O		11	440
36検体				20	8800
				mix	16ul
		1	2	3	4	5	6	7	8	9	10	11	12
SsoFast EvaGreen Supermix With Low ROX	A	1-1	〃	3-1	〃	5-1	〃	1-1	〃	3-1	〃	5-1	〃
	B	1-2	〃	3-2	〃	5-2	〃	1-2	〃	3-2	〃	5-2	〃
	C	1-3	〃	3-3	〃	5-3	〃	1-3	〃	3-3	〃	5-3	〃
	D	2-1	〃	4-1	〃	6-1	〃	2-1	〃	4-1	〃	6-1	〃
CAM	E	2-2	〃	4-2	〃	6-2	〃	2-2	〃	4-2	〃	6-2	〃
Solithromycin(SOLI)	F	2-3	〃	4-3	〃	6-3	〃	2-3	〃	4-3	〃	6-3	〃
	G	1000	100	10	1	0.1	0
20160914	H	〃	〃	〃	〃	〃	〃
20160916		STD		X40
20160920
							90							90
		ｔｋGAPDH	60		Eva	10	900		MUC5AC	60		Eva	10	900		primer 50uM 0.2ul
					FWD	0.2	18		ANO1			FWD	0.2	18		primer 100uM 0.1ul
					REV	0.2	18		CLCA1			REV	0.2	18
					Tem	4			FOXA2(3'側）			Tem	4
					DW	5.6	504		SPDF			DW	5.6	504
					ROX				FOXA2(5'側）			ROX
						20							20
						16	1440						16	1440
		1	2	3	4	5	6	7	8	9	10	11	12
	A	1-1	〃	3-1	〃	5-1	〃	1-1	〃	3-1	〃	5-1	〃			95℃ 30sec		X1
	B	1-2	〃	3-2	〃	5-2	〃	1-2	〃	3-2	〃	5-2	〃			95℃ 5ｓec
	C	1-3	〃	3-3	〃	5-3	〃	1-3	〃	3-3	〃	5-3	〃			60℃ 30sec		X40
	D	2-1	〃	4-1	〃	6-1	〃	2-1	〃	4-1	〃	6-1	〃
	E	2-2	〃	4-2	〃	6-2	〃	2-2	〃	4-2	〃	6-2	〃			95℃ 15sec
	F	2-3	〃	4-3	〃	6-3	〃	2-3	〃	4-3	〃	6-3	〃			60℃ 30sec
	G	1000	100	10	1	0.1	0									95℃ 15sec		X1
	H	〃	〃	〃	〃	〃	〃
		STD		X10
			GAPDH				Muc5ac										CAM			SOLI
					Ave	SD			MUC5/GAPDH		Ave	SD					Ave	SD		Ave	SD	Conversion
		1-1	24.46	24.89	24.675	0.304056	5.66	7.28	0.229382	0.295035	0.262209	0.046424		1	-	-	0.333868	0.0632856	-	0.424849	0.187847	0.0443558
		1-2	25.58	26.03	25.805	0.318198	8.48	9.96	0.328618	0.385972	0.357295	0.0405549		2	-	15ug/ml	0.196846	0.0571196	15ug/ml	0.0429655	0.0174656	0.00448575
		1-3	13.19	20.44	16.815	5.12652	6.35	6.5	0.377639	0.38656	0.382099	0.00630782		3	+	-	9.42073	4.65188	-	9.57821	2.1702	1
		2-1	7.81	9.7	8.755	1.33643	1.16	1.61	0.132496	0.183895	0.158195	0.0363447		4	+	5ug/ml	12.5839	2.30802	5ug/ml	5.44968	2.46936	0.568967
		2-2	21.46	20.49	20.975	0.685894	5.4	5.61	0.257449	0.267461	0.262455	0.0070795		5	+	10ug/ml	8.46515	1.61704	10ug/ml	4.14883	0.173919	0.433153
		2-3	17.4	20.39	18.895	2.11425	3.54	2.88	0.187351	0.152421	0.169886	0.0246992		6	+	15ug/ml	10.2347	2.19774	15ug/ml	2.38201	0.566481	0.24869
		3-1	19.35	24.75	22.05	3.81838	343.7	308.3	15.5873	13.9819	14.7846	1.13522
		3-2	26.3	26.78	26.54	0.339411	175.9	168.6	6.62773	6.35268	6.4902	0.194494
		3-3	22.78	23.26	23.02	0.339411	166.5	155.2	7.23284	6.74196	6.9874	0.347103
		4-1	15.66	15.06	15.36	0.424264	146.1	159.2	9.51172	10.3646	9.93815	0.603066
		4-2	16.71	15.84	16.275	0.615183	200.6	261.1	12.3257	16.043	14.1843	2.62857
		4-3	24.82	23.18	24	1.15966	333.3	320.9	13.8875	13.3708	13.6292	0.365339
		5-1	24.52	22.19	23.355	1.64756	155.2	155.6	6.64526	6.66238	6.65382	0.0121106
		5-2	23.73	20.23	21.98	2.47487	240.7	188.5	10.9509	8.57598	9.76342	1.6793
		5-3	19.74	16.96	18.35	1.96576	170.3	159.2	9.28065	8.67575	8.9782	0.427732
		6-1	21.54	17.34	19.44	2.96985	146.8	154.2	7.55144	7.9321	7.74177	0.269166
		6-2	12.24	11.59	11.915	0.459619	113.8	150	9.55099	12.5892	11.0701	2.14832
		6-3	11.47	9.88	10.675	1.1243	129	124.9	12.0843	11.7002	11.8923	0.271582
		1-1	17.06	16.56	16.81	0.353553	9.45	11.27	0.562165	0.670434	0.6163	0.0765577
		1-2	17.84	23.31	20.575	3.86787	5.38	4.53	0.261482	0.22017	0.240826	0.0292122
		1-3	14.13	11.24	12.685	2.04354	4.85	5.74	0.382341	0.452503	0.417422	0.0496117
		2-1	9.49	11.01	10.25	1.0748	0.261	0.4462	0.0254634	0.0435317	0.0344976	0.0127762
		2-2	8.86	10.65	9.755	1.26572	0.4437	0.1679	0.0454844	0.0172117	0.031348	0.0199918
		2-3	10.16	11.44	10.8	0.905097	0.7424	0.6195	0.0687407	0.0573611	0.0630509	0.00804661
		3-1	24.11	27.48	25.795	2.38295	190.9	197.9	7.40066	7.67203	7.53634	0.191888
		3-2	32.91	30.37	31.64	1.79605	294.7	296.4	9.31416	9.36789	9.34102	0.0379925
		3-3	24.48	22.74	23.61	1.23037	309.7	250.2	13.1173	10.5972	11.8573	1.78199
		4-1	21.2	18.93	20.065	1.60513	116.4	119.7	5.80115	5.96561	5.88338	0.116295
		4-2	19.87	18.9	19.385	0.685894	159.7	137.8	8.23833	7.10859	7.67346	0.798846
		4-3	25.88	25.18	25.53	0.494975	72.95	69.62	2.85742	2.72699	2.79221	0.0922313
		5-1	9.24	10.17	9.705	0.657609	49.86	33.79	5.13756	3.48171	4.30963	1.17086
		5-2	12.73	12.16	12.445	0.403051	46.41	52.26	3.72921	4.19928	3.96424	0.332388
		5-3	9.33	8.92	9.125	0.289914	40.19	35.96	4.40438	3.94082	4.1726	0.327788
		6-1	20.26	18.37	19.315	1.33643	35.53	40.32	1.8395	2.0875	1.9635	0.175358
		6-2	10.61	7.42	9.015	2.25567	28.77	25.8	3.19135	2.8619	3.02662	0.232957
		6-3	12.15	9.21	10.68	2.07889	24.46	21.59	2.29026	2.02154	2.1559	0.190018
			GAPDH				CLCA1										CAM			Solithromycin
					Ave	SD			CLCA1/GAPDH		Ave	SD			IL13		Ave	SD	IL13	Ave	SD	Conversion
		1-1	24.46	24.89	24.675	0.304056	18.74	9.65	0.759473	0.391084	0.575279	0.26049		1	-	-	0.285908	0.255421	-	0.297105	0.271059	0.019628
		1-2	25.58	26.03	25.805	0.318198	2.75	1.99	0.106568	0.0771168	0.0918427	0.0208255		2	-	15ug/ml	0.195609	0.0952638	15ug/ml	0.162562	0.102992	0.0107395
		1-3	13.19	20.44	16.815	5.12652	2.45	3.96	0.145703	0.235504	0.190604	0.0634987		3	+	-	15.4227	8.617	-	15.1368	6.16664	1
		2-1	7.81	9.7	8.755	1.33643	0	5	0	0.571102	0.285551	0.40383		4	+	5ug/ml	18.9433	9.18855	5ug/ml	1.69138	1.40564	0.111739
		2-2	21.46	20.49	20.975	0.685894	3.31	5.31	0.157807	0.253159	0.205483	0.0674238		5	+	10ug/ml	12.6821	5.00928	10ug/ml	1.00673	0.321267	0.0665088
		2-3	17.4	20.39	18.895	2.11425	1.66	1.96	0.0878539	0.103731	0.0957925	0.0112269		6	+	15ug/ml	18.0985	8.58514	15ug/ml	1.39354	0.26255	0.0920627
		3-1	19.35	24.75	22.05	3.81838	558.1	557.5	25.3107	25.2834	25.2971	0.019241
		3-2	26.3	26.78	26.54	0.339411	259.5	353.4	9.77769	13.3157	11.5467	2.50178
		3-3	22.78	23.26	23.02	0.339411	219.4	214.5	9.53084	9.31798	9.42441	0.150514
		4-1	15.66	15.06	15.36	0.424264	444.2	429.8	28.9193	27.9818	28.4505	0.662913
		4-2	16.71	15.84	16.275	0.615183	167.1	162	10.2673	9.95392	10.1106	0.221582
		4-3	24.82	23.18	24	1.15966	373	503.9	15.5417	20.9958	18.2688	3.85668
		5-1	24.52	22.19	23.355	1.64756	209	119	8.94883	5.09527	7.02205	2.72488
		5-2	23.73	20.23	21.98	2.47487	416.2	311.1	18.9354	14.1538	16.5446	3.38112
		5-3	19.74	16.96	18.35	1.96576	231.3	300.1	12.6049	16.3542	14.4796	2.65117
		6-1	21.54	17.34	19.44	2.96985	536.1	490.4	27.5772	25.2263	26.4017	1.66228
		6-2	12.24	11.59	11.915	0.459619	129	91.59	10.8267	7.68695	9.25682	2.22013
		6-3	11.47	9.88	10.675	1.1243	152.3	245.6	14.267	23.007	18.637	6.18015
		1-1	17.06	16.56	16.81	0.353553	15.21	4.68	0.904819	0.278406	0.591612	0.442941
		1-2	17.84	23.31	20.575	3.86787	0	2.39	0	0.11616	0.0580802	0.0821378
		1-3	14.13	11.24	12.685	2.04354	4.73	1.4	0.372881	0.110367	0.241624	0.185626
		2-1	9.49	11.01	10.25	1.0748	1.54	1.93	0.150244	0.188293	0.169268	0.0269046
		2-2	8.86	10.65	9.755	1.26572	1.1	0	0.112763	0	0.0563813	0.0797353
		2-3	10.16	11.44	10.8	0.905097	3.83	1.83	0.35463	0.169444	0.262037	0.130946
		3-1	24.11	27.48	25.795	2.38295	234.5	259.1	9.09091	10.0446	9.56775	0.674349
		3-2	32.91	30.37	31.64	1.79605	465.9	425	14.725	13.4324	14.0787	0.914054
		3-3	24.48	22.74	23.61	1.23037	479.2	548.5	20.2965	23.2317	21.7641	2.0755
		4-1	21.2	18.93	20.065	1.60513	57.5	68.97	2.86569	3.43733	3.15151	0.404212
		4-2	19.87	18.9	19.385	0.685894	32.11	28.96	1.65644	1.49394	1.57519	0.114903
		4-3	25.88	25.18	25.53	0.494975	4.94	12.8	0.193498	0.501371	0.347434	0.217699
		5-1	9.24	10.17	9.705	0.657609	0	14.91	0	1.53632	0.768161	1.08634
		5-2	12.73	12.16	12.445	0.403051	13.18	20.97	1.05906	1.68501	1.37204	0.442616
		5-3	9.33	8.92	9.125	0.289914	1.57	14.49	0.172055	1.58795	0.88	1.00119
		6-1	20.26	18.37	19.315	1.33643	30.61	12.41	1.58478	0.642506	1.11364	0.666288
		6-2	10.61	7.42	9.015	2.25567	3	22.83	0.332779	2.53245	1.43261	1.5554
		6-3	12.15	9.21	10.68	2.07889	23.51	11.4	2.20131	1.06742	1.63436	0.801785
			GAPDH				ANO1										CAM			Solithromycin
					Ave	SD			ANO1/GAPDH		Ave	SD			IL13		Ave	SD	IL13	Ave	SD	Conversion
		1-1	24.46	24.89	24.675	0.304056	5.01	4.22	0.20304	0.171023	0.187031	0.0226389		1	-	-	0.20133	0.0499915	-/-	0.270203	0.0830013	0.0297247		0.00913
		1-2	25.58	26.03	25.805	0.318198	4.12	4.14	0.159659	0.160434	0.160047	0.000548039		2	-	15ug/ml	0.168667	0.0318042	+/18uM	0.0630422	0.0197769	0.00693519		0.002173
		1-3	13.19	20.44	16.815	5.12652	4.26	4.38	0.253345	0.260482	0.256913	0.00504626		3	+	-	8.49085	0.251326	+/-	9.0902	1.38695	1		0.152576
		2-1	7.81	9.7	8.755	1.33643	2.78	0.8117	0.317533	0.0927127	0.205123	0.158972		4	+	5ug/ml	8.33785	0.185079	+/6uM	7.07394	0.284217	0.778195		0.031269
		2-2	21.46	20.49	20.975	0.685894	3.05	3.1	0.145411	0.147795	0.146603	0.00168559		5	+	10ug/ml	9.11407	0.84525	+/12uM	6.8016	1.92695	0.748235		0.211981
		2-3	17.4	20.39	18.895	2.11425	2.87	2.96	0.151892	0.156655	0.154274	0.00336807		6	+	15ug/ml	10.0574	2.04118	+/18uM	6.33793	0.738957	0.697227		0.081292
		3-1	19.35	24.75	22.05	3.81838	193.5	193.1	8.77551	8.75737	8.76644	0.0128273
		3-2	26.3	26.78	26.54	0.339411	210.3	228.9	7.92389	8.62472	8.2743	0.495561
		3-3	22.78	23.26	23.02	0.339411	198	190.2	8.60122	8.26238	8.4318	0.239593
		4-1	15.66	15.06	15.36	0.424264	127.4	131.5	8.29427	8.5612	8.42773	0.188746
		4-2	16.71	15.84	16.275	0.615183	134.9	140.5	8.28879	8.63287	8.46083	0.243306
		4-3	24.82	23.18	24	1.15966	190.3	199.7	7.92917	8.32083	8.125	0.27695
		5-1	24.52	22.19	23.355	1.64756	218.2	210.2	9.34275	9.00021	9.17148	0.242212
		5-2	23.73	20.23	21.98	2.47487	185.4	176.9	8.43494	8.04823	8.24158	0.273449
		5-3	19.74	16.96	18.35	1.96576	184.9	179.5	10.0763	9.78202	9.92916	0.208086
		6-1	21.54	17.34	19.44	2.96985	190.2	173.3	9.78395	8.91461	9.34928	0.614717
		6-2	12.24	11.59	11.915	0.459619	158.2	136.3	13.2774	11.4394	12.3584	1.29968
		6-3	11.47	9.88	10.675	1.1243	93.43	87.29	8.75222	8.17705	8.46464	0.406711
		1-1	17.06	16.56	16.81	0.353553	4.92	5.39	0.292683	0.320642	0.306663	0.0197704
		1-2	17.84	23.31	20.575	3.86787	3.18	4.03	0.154557	0.195869	0.175213	0.0292122
		1-3	14.13	11.24	12.685	2.04354	5.07	3.27	0.399685	0.257785	0.328735	0.100338
		2-1	9.49	11.01	10.25	1.0748	1.01	0.7355	0.0985366	0.0717561	0.0851463	0.0189367
		2-2	8.86	10.65	9.755	1.26572	0.5294	0.388	0.0542696	0.0397745	0.047022	0.0102496
		2-3	10.16	11.44	10.8	0.905097	0.6212	0.6091	0.0575185	0.0563981	0.0569583	0.000792221
		3-1	24.11	27.48	25.795	2.38295	249	255.5	9.65303	9.90502	9.77903	0.178182
		3-2	32.91	30.37	31.64	1.79605	235.1	239.1	7.43047	7.55689	7.49368	0.089394
		3-3	24.48	22.74	23.61	1.23037	245	227.1	10.377	9.61881	9.99788	0.536095
		4-1	21.2	18.93	20.065	1.60513	139.5	139.8	6.9524	6.96736	6.95988	0.0105722
		4-2	19.87	18.9	19.385	0.685894	143.6	143.2	7.40779	7.38716	7.39747	0.0145908
		4-3	25.88	25.18	25.53	0.494975	179.1	171.4	7.01528	6.71367	6.86447	0.213268
		5-1	9.24	10.17	9.705	0.657609	51.25	42.92	5.28078	4.42246	4.85162	0.606924
		5-2	12.73	12.16	12.445	0.403051	83.88	86.58	6.74006	6.95701	6.84853	0.15341
		5-3	9.33	8.92	9.125	0.289914	76.39	82.47	8.37151	9.03781	8.70466	0.471146
		6-1	20.26	18.37	19.315	1.33643	102.4	111.1	5.30158	5.75201	5.52679	0.3185
		6-2	10.61	7.42	9.015	2.25567	60.16	57.29	6.67332	6.35496	6.51414	0.225113
		6-3	12.15	9.21	10.68	2.07889	67.85	81.09	6.353	7.5927	6.97285	0.876601
			GAPDH				FoxA2 3'										CAM			Solithromycin				GAPDH				FoxA2 5'										CAM			ソリスロマイシン
					Ave	SD			FoxA2 3'/GAPDH		Ave	SD			IL13		Ave	SD	IL13	Ave	SD					Ave	SD			FoxA2 5'/GAPDH		Ave	SD					Ave	SD		Ave	SD
		1-1	24.46	24.89	24.675	0.304056	198.7	203.4	8.05268	8.24316	8.14792	0.134687		1	-	-	8.0218	0.84703	-	5.85687	1.35532		1-1	24.46	24.89	24.675	0.304056	205.8	12.85	8.34043	0.52077	4.4306	5.52933		1	-	-	3.3768	0.932503	-/-	4.56703	1.76532
		1-2	25.58	26.03	25.805	0.318198	184.5	182.9	7.14978	7.08777	7.11878	0.0438431		2	-	15ug/ml	8.51942	1.12155	15ug/ml	4.95382	0.429477		1-2	25.58	26.03	25.805	0.318198	1.07	155.9	0.0414648	6.04146	3.04146	4.24264		2	-	15ug/ml	20.819	24.5042	+/18uM	2.79644	2.07415
		1-3	13.19	20.44	16.815	5.12652	156.1	139.8	9.28338	8.31401	8.79869	0.68545		3	+	-	6.25435	1.12496	-	5.07735	1.09291		1-3	13.19	20.44	16.815	5.12652	73.63	15.77	4.37883	0.937853	2.65834	2.43314		3	+	-	0.419743	0.442067	+/-	0.203035	0.298645
		2-1	7.81	9.7	8.755	1.33643	67.03	87.73	7.6562	10.0206	8.83838	1.67186		4	+	5ug/ml	6.55724	0.573252	5ug/ml	5.35293	0.581897		2-1	7.81	9.7	8.755	1.33643	129.6	0.6752	14.803	0.0771216	7.44005	10.4127		4	+	5ug/ml	0.18824	0.175767	+/6uM	0.158804	0.143997
		2-2	21.46	20.49	20.975	0.685894	130.7	174.4	6.23123	8.31466	7.27294	1.47321		5	+	10ug/ml	4.28965	0.823677	10ug/ml	6.9677	1.39604		2-2	21.46	20.49	20.975	0.685894	5.5	242.7	0.262217	11.5709	5.91657	7.99646		5	+	10ug/ml	0.274313	0.193812	+/12uM	0.168391	0.21253
		2-3	17.4	20.39	18.895	2.11425	172.6	184.4	9.13469	9.7592	9.44694	0.441591		6	+	15ug/ml	4.91202	0.508398	15ug/ml	6.74948	0.833797		2-3	17.4	20.39	18.895	2.11425	1186	669.5	62.7679	35.4327	49.1003	19.329		6	+	15ug/ml	0.124035	0.0798234	+/18uM	0.15534	0.243507
		3-1	19.35	24.75	22.05	3.81838	162.9	165.9	7.38776	7.52381	7.45578	0.096205											3-1	19.35	24.75	22.05	3.81838	3.41	0	0.154649	0	0.0773243	0.109353
		3-2	26.3	26.78	26.54	0.339411	162.4	160.4	6.11907	6.04371	6.08139	0.0532861											3-2	26.3	26.78	26.54	0.339411	47.07	1.7	1.77355	0.0640543	0.918802	1.2088
		3-3	22.78	23.26	23.02	0.339411	120.3	120.3	5.22589	5.22589	5.22589	0											3-3	22.78	23.26	23.02	0.339411	0.7633	11.35	0.0331581	0.49305	0.263104	0.325192
		4-1	15.66	15.06	15.36	0.424264	83.79	98.88	5.45508	6.4375	5.94629	0.694677											4-1	15.66	15.06	15.36	0.424264	3.33	0.9695	0.216797	0.0631185	0.139958	0.108667
		4-2	16.71	15.84	16.275	0.615183	100.8	115.4	6.19355	7.09063	6.64209	0.634332											4-2	16.71	15.84	16.275	0.615183	9.8	2.67	0.602151	0.164055	0.383103	0.30978
		4-3	24.82	23.18	24	1.15966	167.9	172.1	6.99583	7.17083	7.08333	0.123744											4-3	24.82	23.18	24	1.15966	0.5897	1.41	0.0245708	0.05875	0.0416604	0.0241683
		5-1	24.52	22.19	23.355	1.64756	122	113.4	5.22372	4.85549	5.03961	0.260378											5-1	24.52	22.19	23.355	1.64756	12.5	0	0.535217	0	0.267609	0.378456
		5-2	23.73	20.23	21.98	2.47487	92.14	57.68	4.19199	2.6242	3.4081	1.10859											5-2	23.73	20.23	21.98	2.47487	3.69	0	0.16788	0	0.0839399	0.118709
		5-3	19.74	16.96	18.35	1.96576	90.7	71.56	4.94278	3.89973	4.42125	0.737549											5-3	19.74	16.96	18.35	1.96576	14.98	2.32	0.816349	0.126431	0.47139	0.487846
		6-1	21.54	17.34	19.44	2.96985	99.03	91.58	5.09414	4.71091	4.90252	0.270985											6-1	21.54	17.34	19.44	2.96985	0.5751	7.14	0.0295833	0.367284	0.198434	0.23879
		6-2	12.24	11.59	11.915	0.459619	68.12	61.16	5.71716	5.13303	5.42509	0.413048											6-2	12.24	11.59	11.915	0.459619	0.9464	0	0.0794293	0	0.0397146	0.056165
		6-3	11.47	9.88	10.675	1.1243	52.02	42.1	4.87307	3.94379	4.40843	0.657096											6-3	11.47	9.88	10.675	1.1243	0	2.86	0	0.267916	0.133958	0.189445
		1-1	17.06	16.56	16.81	0.353553	125.1	121.5	7.442	7.22784	7.33492	0.151433											1-1	17.06	16.56	16.81	0.353553	90.24	3.37	5.36823	0.200476	2.78435	3.65416
		1-2	17.84	23.31	20.575	3.86787	91.17	101.1	4.43111	4.91373	4.67242	0.341267											1-2	17.84	23.31	20.575	3.86787	258	1.84	12.5395	0.0894289	6.31446	8.80352
		1-3	14.13	11.24	12.685	2.04354	74.41	66.73	5.86598	5.26054	5.56326	0.42811											1-3	14.13	11.24	12.685	2.04354	30.91	85.85	2.43674	6.76784	4.60229	3.06255
		2-1	9.49	11.01	10.25	1.0748	60.24	44.12	5.87707	4.30439	5.09073	1.11205											2-1	9.49	11.01	10.25	1.0748	8.68	32.75	0.846829	3.19512	2.02098	1.66049
		2-2	8.86	10.65	9.755	1.26572	35.24	52.02	3.61251	5.33265	4.47258	1.21633											2-2	8.86	10.65	9.755	1.26572	7.03	93.38	0.720656	9.57253	5.14659	6.25922
		2-3	10.16	11.44	10.8	0.905097	46.05	68.39	4.26389	6.33241	5.29815	1.46266											2-3	10.16	11.44	10.8	0.905097	14.78	11.61	1.36852	1.075	1.22176	0.207549
		3-1	24.11	27.48	25.795	2.38295	158.4	167.8	6.14072	6.50514	6.32293	0.257678											3-1	24.11	27.48	25.795	2.38295	11.15	17.07	0.432254	0.661756	0.547005	0.162282
		3-2	32.91	30.37	31.64	1.79605	149.8	143.2	4.73451	4.52592	4.63021	0.1475											3-2	32.91	30.37	31.64	1.79605	0.6196	0	0.0195828	0	0.0097914	0.0138471
		3-3	24.48	22.74	23.61	1.23037	116	86.05	4.91317	3.64464	4.27891	0.896986											3-3	24.48	22.74	23.61	1.23037	1.41	1.06	0.0597205	0.0448962	0.0523083	0.0104823
		4-1	21.2	18.93	20.065	1.60513	105.7	91.13	5.26788	4.54174	4.90481	0.513459											4-1	21.2	18.93	20.065	1.60513	0.6246	12.31	0.0311288	0.613506	0.322317	0.411803
		4-2	19.87	18.9	19.385	0.685894	109.4	90.01	5.64354	4.64328	5.14341	0.707289											4-2	19.87	18.9	19.385	0.685894	4	0	0.206345	0	0.103173	0.145908
		4-3	25.88	25.18	25.53	0.494975	171.1	135.8	6.70192	5.31923	6.01058	0.977707											4-3	25.88	25.18	25.53	0.494975	1.31	1.29	0.0513122	0.0505288	0.0509205	0.000553942
		5-1	9.24	10.17	9.705	0.657609	64.78	39.36	6.67491	4.05564	5.36528	1.8521											5-1	9.24	10.17	9.705	0.657609	0	1.43	0	0.147347	0.0736734	0.10419
		5-2	12.73	12.16	12.445	0.403051	106.6	90.55	8.56569	7.27601	7.92085	0.911938											5-2	12.73	12.16	12.445	0.403051	10.25	0	0.823624	0	0.411812	0.58239
		5-3	9.33	8.92	9.125	0.289914	92.03	46.98	10.0855	5.14849	7.61699	3.49098											5-3	9.33	8.92	9.125	0.289914	0.3593	0	0.0393753	0	0.0196877	0.0278426
		6-1	20.26	18.37	19.315	1.33643	88.78	155.5	4.59643	8.05074	6.32358	2.44257											6-1	20.26	18.37	19.315	1.33643	0	0.4497	0	0.0232824	0.0116412	0.0164632
		6-2	10.61	7.42	9.015	2.25567	63.73	48.32	7.06933	5.35996	6.21464	1.20871											6-2	10.61	7.42	9.015	2.25567	7.87	0	0.872989	0	0.436495	0.617297
		6-3	12.15	9.21	10.68	2.07889	76.54	88.15	7.16667	8.25375	7.71021	0.768681											6-3	12.15	9.21	10.68	2.07889	0.382	0	0.0357678	0	0.0178839	0.0252916
			GAPDH				SPDEF										CAM			Solithromycin
					Ave	SD			SPDEF/GAPDH		Ave	SD			IL13		Ave	SD	IL13	Ave	SD	Conversion
		1-1	24.46	24.89	24.675	0.304056	10.97	12.65	0.44458	0.512665	0.478622	0.0481434		1	-	-	0.558564	0.0808034	-	0.564186	0.0119485	0.072088
		1-2	25.58	26.03	25.805	0.318198	14.46	14.28	0.560357	0.553381	0.556869	0.00493235		2	-	15ug/ml	0.459101	0.0930477	15ug/ml	0.619444	0.027602	0.0791485
		1-3	13.19	20.44	16.815	5.12652	10.37	11.16	0.616711	0.663693	0.640202	0.0332212		3	+	-	6.66835	0.73469	-	7.82635	1.36314	1
		2-1	7.81	9.7	8.755	1.33643	3.37	3.28	0.384923	0.374643	0.379783	0.00726894		4	+	5ug/ml	7.13331	0.435221	5ug/ml	9.8775	1.46399	1.26208
		2-2	21.46	20.49	20.975	0.685894	8.15	10.14	0.388558	0.483433	0.435995	0.0670867		5	+	10ug/ml	6.55155	0.290055	10ug/ml	9.38268	3.38367	1.19886
		2-3	17.4	20.39	18.895	2.11425	8.48	12.74	0.448796	0.674252	0.561524	0.159422		6	+	15ug/ml	8.2618	0.0900753	15ug/ml	9.17433	0.546327	1.17224
		3-1	19.35	24.75	22.05	3.81838	179.3	151.7	8.13152	6.87982	7.50567	0.885086
		3-2	26.3	26.78	26.54	0.339411	165.3	172.7	6.22833	6.50716	6.36775	0.197159
		3-3	22.78	23.26	23.02	0.339411	149.2	133.1	6.48132	5.78193	6.13162	0.494545
		4-1	15.66	15.06	15.36	0.424264	113.8	118.7	7.40885	7.72786	7.56836	0.225574
		4-2	16.71	15.84	16.275	0.615183	116.9	115.3	7.1828	7.08449	7.13364	0.0695159
		4-3	24.82	23.18	24	1.15966	163.2	158.3	6.8	6.59583	6.69792	0.144368
		5-1	24.52	22.19	23.355	1.64756	144.9	146.2	6.20424	6.2599	6.23207	0.0393594
		5-2	23.73	20.23	21.98	2.47487	158.6	132.6	7.21565	6.03276	6.6242	0.836432
		5-3	19.74	16.96	18.35	1.96576	119.8	129.7	6.52861	7.06812	6.79837	0.381491
		6-1	21.54	17.34	19.44	2.96985	162.7	154.6	8.36934	7.95267	8.16101	0.294628
		6-2	12.24	11.59	11.915	0.459619	103.5	94.05	8.68653	7.89341	8.28997	0.560819
		6-3	11.47	9.88	10.675	1.1243	90.04	87.9	8.43466	8.23419	8.33443	0.141753
ソリは下半分		1-1	17.06	16.56	16.81	0.353553	10.03	9.14	0.596669	0.543724	0.570196	0.0374375
		1-2	17.84	23.31	20.575	3.86787	11.27	11.38	0.547752	0.553098	0.550425	0.0037804
		1-3	14.13	11.24	12.685	2.04354	6.93	7.58	0.546315	0.597556	0.571935	0.0362333
		2-1	9.49	11.01	10.25	1.0748	6.2	6.09	0.604878	0.594146	0.599512	0.00758846
		2-2	8.86	10.65	9.755	1.26572	6.56	6.14	0.672476	0.629421	0.650948	0.0304444
		2-3	10.16	11.44	10.8	0.905097	6.91	6.22	0.639815	0.575926	0.60787	0.0451763
		3-1	24.11	27.48	25.795	2.38295	186.1	212.4	7.21458	8.23415	7.72437	0.72095
		3-2	32.91	30.37	31.64	1.79605	217.5	194.9	6.87421	6.15992	6.51707	0.505076
		3-3	24.48	22.74	23.61	1.23037	235	201.2	9.95341	8.52181	9.23761	1.01229
		4-1	21.2	18.93	20.065	1.60513	244.9	210	12.2053	10.466	11.3357	1.2299
		4-2	19.87	18.9	19.385	0.685894	205.2	178.2	10.5855	9.19267	9.88909	0.984879
		4-3	25.88	25.18	25.53	0.494975	221.5	207.8	8.67607	8.13944	8.40776	0.37945
		5-1	9.24	10.17	9.705	0.657609	56.6	53.58	5.83205	5.52087	5.67646	0.220037
		5-2	12.73	12.16	12.445	0.403051	127.7	125.3	10.2611	10.0683	10.1647	0.136365
		5-3	9.33	8.92	9.125	0.289914	114.9	109.7	12.5918	12.0219	12.3068	0.402954
		6-1	20.26	18.37	19.315	1.33643	166.7	170.1	8.6306	8.80663	8.71861	0.124471
		6-2	10.61	7.42	9.015	2.25567	82.21	80.5	9.11925	8.92956	9.0244	0.134127
		6-3	12.15	9.21	10.68	2.07889	101.2	107.7	9.47566	10.0843	9.77996	0.430355
