# Supplementary material for: Solithromycin inhibits IL-13-induced goblet cell hyperplasia and MUC5AC, CLCA1, and ANO1 in human bronchial epithelial cells
Source: PeerJ. 2023 Jan 17;11:e14695. doi: 10.7717/peerj.14695 (PMC9854378; doi:10.7717/peerj.14695)
Supplement: Supplemental Information 3 [file peerj-11-14695-s003.xlsx]

## Sheet: Figure4B
		ＡＮＯ１
		Name	Volume	Volume + Background	Background	Background Level	Background Type	Median Intensity	Average Intensity	Mode Intensity	Std Dev	Variance	Min Intensity	Max Intensity	Percent	Area > Background	Centre X	Centre Y	Width	Height	Area	Comment
	1	1	3466056	9854962	6388906	3758.18	Shape 13	5387	5797.04	5059	1171.91	1.37337e+06	4274	9328	1.58	1700	232	69	50	34	1700
	2	2	3287138	9676044	6388906	3758.18	Shape 13	5445	5691.79	4872	833.37	694508	4310	8264	1.5	1700	291	65	50	34	1700
	3	3	32181985	38570891	6388906	3758.18	Shape 13	24226	22688.8	27064	6576.19	4.32462e+07	5872	32383	14.65	1700	343	62	50	34	1700
	4	4	31531524	37920430	6388906	3758.18	Shape 13	22867.5	22306.1	22338	6018.53	3.62227e+07	7758	32362	14.35	1700	403	55	50	34	1700
	5	5	35404626	41793532	6388906	3758.18	Shape 13	25540	24584.4	26899	6089.94	3.70874e+07	7439	34030	16.11	1700	458	55	50	34	1700
	6	6	31760149	38149055	6388906	3758.18	Shape 13	23388	22440.6	24476	5719.4	3.27116e+07	7490	32830	14.45	1700	515	54	50	34	1700
	7	7	3565056	9953962	6388906	3758.18	Shape 13	5615	5855.27	5039	1080.76	1.16804e+06	3955	8942	1.62	1700	575	51	50	34	1700
	8	8	1272471	7661377	6388906	3758.18	Shape 13	4354	4506.69	3940	595.07	354109	3639	6300	0.58	1662	632	49	50	34	1700
	9	9	3.28861e+07	39132079	6.24596e+06	2534.89	Shape 13	17654.5	15881.5	19974	5483.9	3.00731e+07	3374	24164	18.8	2464	257	79	56	44	2464
	10	10	20872531	27261437	6388906	3758.18	Shape 13	16849	16036.1	15321	3000.45	9.00271e+06	7136	20290	9.5	1700	748	50	50	34	1700
	11	11	22545833	28934739	6388906	3758.18	Shape 13	18375	17020.4	18829	3477.06	1.20899e+07	7127	21340	10.26	1700	806	47	50	34	1700
	12	12	22734369	29123275	6388906	3758.18	Shape 13	17941.5	17131.3	17946	2745.94	7.54021e+06	7532	20861	10.35	1700	867	36	50	34	1700
		Book1 GAPDH-M
		Name	Volume	Volume + Background	Background	Background Level	Background Type	Median Intensity	Average Intensity	Mode Intensity	Std Dev	Variance	Min Intensity	Max Intensity	Percent	Area > Background	Centre X	Centre Y	Width	Height	Area	Comment
	1	1	1.43764e+07	16384893	2.00844e+06	1054.86	Shape 14	6732	8605.51	2846	6182.66	3.82253e+07	1266	25573	5.85	1904	81	29	68	28	1904
	2	2	1.28292e+07	15192039	2.36288e+06	1054.86	Shape 14	4488.5	6782.16	1517	5412.76	2.92979e+07	1328	20267	5.22	2240	149	33	70	32	2240
	3	3	2.0869e+07	23231864	2.36288e+06	1054.86	Shape 14	6817.5	10371.4	4976	8464.23	7.16432e+07	1496	32824	8.49	2240	212	36	70	32	2240
	4	4	2.21916e+07	24554460	2.36288e+06	1054.86	Shape 14	7598	10961.8	3023	8657.6	7.4954e+07	1685	34741	9.03	2240	273	39	70	32	2240
	5	5	2.76557e+07	30018573	2.36288e+06	1054.86	Shape 14	9807.5	13401.1	3860	10023.6	1.00474e+08	1651	38153	11.25	2240	331	40	70	32	2240
	6	6	2.42681e+07	26630941	2.36288e+06	1054.86	Shape 14	9075	11888.8	4955	8944.18	7.99983e+07	1464	33834	9.87	2240	388	48	70	32	2240
	7	7	2.56212e+07	27984048	2.36288e+06	1054.86	Shape 14	9592	12492.9	2588	8964.46	8.03616e+07	1694	34750	10.42	2240	446	58	70	32	2240
	8	8	1.90437e+07	21406550	2.36288e+06	1054.86	Shape 14	7816.5	9556.5	3157	6342.51	4.02274e+07	1604	24023	7.75	2240	501	64	70	32	2240
	9	9	2.12671e+07	23005361	1.73821e+06	1065.08	Shape 14	11119.5	14096.4	3814	9383.39	8.80479e+07	2121	34852	15.15	1632	225	63	68	24	1632
	10	10	1.8915e+07	21277868	2.36288e+06	1054.86	Shape 14	6194	9499.05	2235	7875.28	6.202e+07	1408	30643	7.69	2240	614	59	70	32	2240
	11	11	2.27046e+07	25067472	2.36288e+06	1054.86	Shape 14	7520.5	11190.8	2200	9026.07	8.14699e+07	1325	33114	9.24	2240	682	52	70	32	2240
	12	12	1.8781e+07	21143854	2.36288e+06	1054.86	Shape 14	6846	9439.22	1324	7559.87	5.71516e+07	1224	27328	7.64	2240	753	34	70	32	2240
		Name	Volume	Volume + Background	Background	Background Level	Background Type	Median Intensity	Average Intensity	Mode Intensity	Std Dev	Variance	Min Intensity	Max Intensity	Percent	Area > Background	Centre X	Centre Y	Width	Height	Area	Comment
	7	7	934464	3112001	2.17754e+06	1680.2	Shape 13	2370	2401.24	2179	305.24	93170.7	1709	3050	0.72	1296	417	46	54	24	1296
	8	8	874404	3051941	2.17754e+06	1680.2	Shape 13	2234.5	2354.89	1946	440.71	194226	1692	3799	0.68	1296	476	47	54	24	1296
	3	3	3.78309e+07	40009373	2.17848e+06	1146.57	Shape 13	22061.5	21057.6	23336	6718.15	4.51336e+07	3311	31892	13.38	1900	314	150	50	38	1900
	10	10	1.76611e+07	19838643	2.17754e+06	1680.2	Shape 13	14819.5	15307.6	10657	5265.45	2.7725e+07	4448	24102	13.63	1296	602	45	54	24	1296
	11	11	1.93254e+07	21502888	2.17754e+06	1680.2	Shape 13	16127.5	16591.7	10763	6717.25	4.51214e+07	3865	29001	14.92	1296	666	42	54	24	1296
	12	12	1.82051e+07	20382600	2.17754e+06	1680.2	Shape 13	16280	15727.3	21499	5442.5	2.96208e+07	3617	24239	14.05	1296	726	44	54	24	1296
		GAPDH-M1 20180316
		Name	Volume	Volume + Background	Background	Background Level	Background Type	Median Intensity	Average Intensity	Mode Intensity	Std Dev	Variance	Min Intensity	Max Intensity	Percent	Area > Background	Centre X	Centre Y	Width	Height	Area	Comment
	7	7	1.21103e+07	13717626	1.60733e+06	1065.87	Shape 13	6707	9096.57	1861	6627.78	4.39275e+07	1425	24554	6.01	1508	504	55	58	26	1508
	8	8	8.80333e+06	10410660	1.60733e+06	1065.87	Shape 13	5388	6903.62	3008	4510.66	2.0346e+07	1438	17190	4.37	1508	566	56	58	26	1508
	3	3	1.81936e+07	19967698	1.77414e+06	1019.62	Shape 13	7335.5	11475.7	2067	9945.82	9.89192e+07	1328	36726	9.21	1740	317	157	58	30	1740
	10	10	1.24542e+07	14061512	1.60733e+06	1065.87	Shape 13	7637.5	9324.61	6465	5936.02	3.52364e+07	1530	23833	6.18	1508	693	65	58	26	1508
	11	11	2.51074e+07	26714688	1.60733e+06	1065.87	Shape 13	14899.5	17715.3	11536	11533.8	1.33029e+08	2157	44655	12.46	1508	758	66	58	26	1508
	12	12	2.20271e+07	23634442	1.60733e+06	1065.87	Shape 13	12899.5	15672.7	2845	10287.6	1.05835e+08	1948	37640	10.93	1508	823	65	58	26	1508
										Well1	Well2	Well3	Ave	SD
			ANO1	GAPDH	ANO1/GAP				-/-	0.21154	0.127396	0.0771628	0.1387	0.0678979
	Well1	-/-	3466056	16384893	0.21154				-/+	0.216372	0.0594431	0.0993265	0.125047	0.0815652
		-/+	3287138	15192039	0.216372				+/-	1.38525	1.54633	2.07936	1.67031	0.363282
		+/-	32181985	23231864	1.38525				+/5ug	1.28415	0.98095	1.41809	1.22773	0.223963
		+/5ug	31531524	24554460	1.28415				+/10ug	1.17942	0.899406	0.769709	0.949513	0.209403
		+/10ug	35404626	30018573	1.17942				+/15ug	1.1926	1.07522	0.826484	1.03144	0.186946
		+/15ug	31760149	26630941	1.1926
	Well2	-/-	3565056	27984048	0.127396
		-/+	1272471	21406550	0.0594431
		+/-	3.28861e+07	2.12671e+07	1.54633
		+/5ug	20872531	21277868	0.98095
		+/10ug	22545833	25067472	0.899406
		+/15ug	22734369	21143854	1.07522
	Well3	-/-	934464	1.21103e+07	0.0771628
		-/+	874404	8.80333e+06	0.0993265
		+/-	3.78309e+07	1.81936e+07	2.07936
		+/5ug	1.76611e+07	1.24542e+07	1.41809
		+/10ug	1.93254e+07	2.51074e+07	0.769709
		+/15ug	1.82051e+07	2.20271e+07	0.826484

## Sheet: Figure4A CLCA1
	Book2 CLCA1-M1 20180323
	Name	Volume	Volume + Background	Background	Background Level	Background Type	Median Intensity	Average Intensity	Mode Intensity	Std Dev	Variance	Min Intensity	Max Intensity	Percent	Area > Background	Centre X	Centre Y	Width	Height	Area	Comment
1	1	0	3733591	4.52947e+06	2527.6	Shape 13	2082	2083.48	1891	179.96	32386.5	1677	2458	-2.64	0	30	60	56	32	1792
2	2	0	4136860	4.52947e+06	2527.6	Shape 13	2325	2308.52	2406	161.18	25979.6	1876	2627	-1.3	118	89	60	56	32	1792
3	3	1.01003e+07	14629745	4.52947e+06	2527.6	Shape 13	7032	8163.92	4899	3721.33	1.38483e+07	2456	17228	33.49	1791	157	60	56	32	1792
4	4	0	3738758	4.52947e+06	2527.6	Shape 13	2047	2086.36	1868	264.27	69840.7	1604	2824	-2.62	150	221	59	56	32	1792
5	5	0	3538989	4.52947e+06	2527.6	Shape 13	1968	1974.88	1688	185.68	34475.9	1607	2477	-3.28	0	285	58	56	32	1792
6	6	0	3591551	4.52947e+06	2527.6	Shape 13	2016	2004.21	2089	161.49	26077.6	1703	2397	-3.11	0	346	59	56	32	1792
7	7	0	3676911	4.52947e+06	2527.6	Shape 13	2040	2051.85	1935	193.51	37445.6	1597	2431	-2.83	0	407	58	56	32	1792
8	8	0	4082827	4.52947e+06	2527.6	Shape 13	2272	2278.36	2231	222.51	49511	1806	3522	-1.48	142	452	53	56	32	1792
9	9	2.58021e+07	30331568	4.52947e+06	2527.6	Shape 13	13825	16926.1	11687	10432.1	1.0883e+08	2733	41479	85.54	1792	511	53	56	32	1792
10	10	0	4454183	4.52947e+06	2527.6	Shape 13	2503.5	2485.59	2567	160.94	25900.6	2115	2843	-0.25	787	576	53	56	32	1792
11	11	0	4457188	4.52947e+06	2527.6	Shape 13	2485.5	2487.27	2461	108.62	11798.5	2179	2750	-0.24	630	636	53	56	32	1792
12	12	0	4144560	4.52947e+06	2527.6	Shape 13	2306	2312.81	2228	88.64	7856.92	2112	2593	-1.28	28	697	54	56	32	1792
Book2 CLCA1-M1 RE 20180323
	Name	Volume	Volume + Background	Background	Background Level	Background Type	Median Intensity	Average Intensity	Mode Intensity	Std Dev	Variance	Min Intensity	Max Intensity	Percent	Area > Background	Centre X	Centre Y	Width	Height	Area	Comment
1	1	924561	3771844	2.84728e+06	1588.89	Shape 15	2113	2104.82	1891	175.99	30972.4	1717	2458	1.86	1792	31	59	56	32	1792
2	2	1.32811e+06	4175389	2.84728e+06	1588.89	Shape 15	2360	2330.02	2406	181.78	33042.7	1855	2799	2.67	1792	96	61	56	32	1792
3	3	1.16746e+07	14521916	2.84728e+06	1588.89	Shape 15	7032	8103.75	4899	3786.93	1.43408e+07	2329	17228	23.5	1792	156	62	56	32	1792
4	4	777699	3624982	2.84728e+06	1588.89	Shape 15	1984.5	2022.87	1868	261.75	68514.5	1542	2812	1.57	1775	220	62	56	32	1792
5	5	577335	3424618	2.84728e+06	1588.89	Shape 15	1912	1911.06	1688	180.56	32601.1	1591	2429	1.16	1792	281	62	56	32	1792
6	6	684128	3531411	2.84728e+06	1588.89	Shape 15	1969	1970.65	2100	163.17	26626	1667	2397	1.38	1792	343	61	56	32	1792
7	7	752572	3599855	2.84728e+06	1588.89	Shape 15	1993.5	2008.85	1935	193.89	37595	1550	2399	1.52	1787	404	60	56	32	1792
8	8	1.10439e+06	3951676	2.84728e+06	1588.89	Shape 15	2184.5	2205.18	2231	332.89	110813	1685	4337	2.22	1792	454	61	56	32	1792
9	9	2.74799e+07	30327187	2.84728e+06	1588.89	Shape 15	13825	16923.7	11687	10434.8	1.08885e+08	2884	41479	55.32	1792	512	53	56	32	1792
10	10	1.56831e+06	4415591	2.84728e+06	1588.89	Shape 15	2458	2464.06	2374	207.42	43021.9	2050	3345	3.16	1792	571	57	56	32	1792
11	11	1.54275e+06	4390031	2.84728e+06	1588.89	Shape 15	2460	2449.79	2545	125.85	15838	2114	2750	3.11	1792	634	58	56	32	1792
12	12	1.25931e+06	4106589	2.84728e+06	1588.89	Shape 15	2281	2291.62	2228	99.97	9993.45	2070	2593	2.54	1792	693	59	56	32	1792
Book1 GAPDH-M1 20180323
	Name	Volume	Volume + Background	Background	Background Level	Background Type	Median Intensity	Average Intensity	Mode Intensity	Std Dev	Variance	Min Intensity	Max Intensity	Percent	Area > Background	Centre X	Centre Y	Width	Height	Area	Comment
1	1	2.26123e+07	24350900	1.73857e+06	1034.86	Shape 13	11837	14494.6	3466	9953.41	9.90704e+07	1743	38274	10.46	1680	138	57	60	28	1680
2	2	1.95694e+07	21307947	1.73857e+06	1034.86	Shape 13	10081.5	12683.3	2289	8531.07	7.27791e+07	1996	32977	9.05	1680	208	63	60	28	1680
3	3	2.40821e+07	25820654	1.73857e+06	1034.86	Shape 13	11603.5	15369.4	2681	10787.7	1.16374e+08	1989	39556	11.14	1680	274	63	60	28	1680
4	4	2.20971e+07	23835649	1.73857e+06	1034.86	Shape 13	10449.5	14187.9	2450	10255.6	1.05178e+08	1858	38820	10.22	1680	336	62	60	28	1680
5	5	2.37426e+07	25481168	1.73857e+06	1034.86	Shape 13	11470.5	15167.4	2637	10759.3	1.15763e+08	1946	39626	10.98	1680	397	61	60	28	1680
6	6	2.02344e+07	21972995	1.73857e+06	1034.86	Shape 13	10938.5	13079.2	7901	7930.09	6.28863e+07	2061	29414	9.36	1680	458	58	60	28	1680
7	7	1.61363e+07	17874855	1.73857e+06	1034.86	Shape 13	8369	10639.8	4515	6853.86	4.69754e+07	1876	26748	7.46	1680	517	59	60	28	1680
8	8	1.31009e+07	14839493	1.73857e+06	1034.86	Shape 13	7283	8833.03	3008	5143.31	2.64536e+07	1744	19689	6.06	1680	576	57	60	28	1680
9	9	1.4836e+07	16574606	1.73857e+06	1034.86	Shape 13	8000.5	9865.84	2877	6007.64	3.60918e+07	1966	23235	6.86	1680	637	55	60	28	1680
10	10	1.1797e+07	13535571	1.73857e+06	1034.86	Shape 13	6044.5	8056.89	2500	5264.5	2.77149e+07	1608	20126	5.46	1680	694	55	60	28	1680
11	11	1.5924e+07	17662597	1.73857e+06	1034.86	Shape 13	7946.5	10513.5	3342	7503.39	5.63009e+07	1415	29409	7.37	1680	752	52	60	28	1680
12	12	1.20668e+07	13805330	1.73857e+06	1034.86	Shape 13	6067.5	8217.46	1946	6156.16	3.78983e+07	1164	23574	5.58	1680	815	41	60	28	1680
Book1 CLCA1-M2 20180323
	Name	Volume	Volume + Background	Background	Background Level	Background Type	Median Intensity	Average Intensity	Mode Intensity	Std Dev	Variance	Min Intensity	Max Intensity	Percent	Area > Background	Centre X	Centre Y	Width	Height	Area	Comment
1	1	1.39145e+06	6569215	5.17776e+06	3451.84	Shape 7	4381	4379.48	4377	179.46	32206.1	3890	4841	4.62	1500	30	37	50	30	1500
2	2	1.35531e+06	6533075	5.17776e+06	3451.84	Shape 7	4382	4355.38	4501	223.02	49737.6	3901	5016	4.5	1500	88	38	50	30	1500
3	3	2.59867e+07	31164418	5.17776e+06	3451.84	Shape 7	18929.5	20776.3	7856	9511.44	9.04675e+07	5268	42803	86.3	1500	152	35	50	30	1500
4	4	558518	5736278	5.17776e+06	3451.84	Shape 7	3742.5	3824.19	3644	319.62	102157	3465	5793	1.85	1500	207	36	50	30	1500
5	5	306684	5484444	5.17776e+06	3451.84	Shape 7	3653	3656.3	3661	169.51	28735	3311	4170	1.02	1299	261	36	50	30	1500
6	6	514882	5692642	5.17776e+06	3451.84	Shape 7	3802	3795.09	3836	97.41	9488.2	3586	4118	1.71	1500	315	36	50	30	1500
Book1 GAPDH-M2 20180323
	Name	Volume	Volume + Background	Background	Background Level	Background Type	Median Intensity	Average Intensity	Mode Intensity	Std Dev	Variance	Min Intensity	Max Intensity	Percent	Area > Background	Centre X	Centre Y	Width	Height	Area	Comment
1	1	2.7589e+07	29770451	2.1815e+06	1034.87	Shape 13	9653	14122.6	1891	12163.2	1.47945e+08	1243	42365	13.34	2108	147	75	62	34	2108
2	2	1.56109e+07	17792440	2.1815e+06	1034.87	Shape 13	4904.5	8440.44	3136	7669.54	5.88218e+07	1272	30985	7.55	2108	218	86	62	34	2108
3	3	2.52821e+07	27463617	2.1815e+06	1034.87	Shape 13	8090	13028.3	2814	11715.8	1.3726e+08	1316	42343	12.23	2108	281	88	62	34	2108
4	4	1.56758e+07	17857261	2.1815e+06	1034.87	Shape 13	5016.5	8471.19	1839	7698.49	5.92668e+07	1325	34145	7.58	2108	345	87	62	34	2108
5	5	1.45508e+07	16732267	2.1815e+06	1034.87	Shape 13	4847.5	7937.51	2161	6850.34	4.69272e+07	1278	28074	7.04	2108	406	84	62	34	2108
6	6	7.7517e+06	9933201	2.1815e+06	1034.87	Shape 13	3139.5	4712.14	1283	3658.94	1.33878e+07	1201	16141	3.75	2108	464	81	62	34	2108
7	7	1.1252e+07	13433529	2.1815e+06	1034.87	Shape 13	4167.5	6372.64	2448	5196.93	2.70081e+07	1191	20689	5.44	2108	527	79	62	34	2108
8	8	8.07443e+06	10255934	2.1815e+06	1034.87	Shape 13	3285	4865.24	1296	3694.98	1.36528e+07	1197	15017	3.9	2108	590	78	62	34	2108
9	9	1.76684e+07	19849928	2.1815e+06	1034.87	Shape 13	6191	9416.47	2106	7798.68	6.08194e+07	1330	29609	8.54	2108	649	74	62	34	2108
10	10	1.82782e+07	20459695	2.1815e+06	1034.87	Shape 13	6590	9705.74	1646	7852.92	6.16684e+07	1497	29777	8.84	2108	717	74	62	34	2108
11	11	2.88371e+07	31018623	2.1815e+06	1034.87	Shape 13	10263.5	14714.7	3005	11394.8	1.29842e+08	1790	43091	13.94	2108	782	78	62	34	2108
12	12	1.62348e+07	18416274	2.1815e+06	1034.87	Shape 13	5956	8736.37	3070	6581.49	4.3316e+07	1721	25886	7.85	2108	848	69	62	34	2108
	7-12は不良
				ＣＬＣＡ１	GAPDH	CLCA1/GAP				Well1	Well2	Well3	Ave	SD
		Well1	-/-	924561	2.26123e+07	0.0408875			-/-	0.0408875	0.0466385	0.0504352	0.0459871	0.00480709
			-/+	1.32811e+06	1.95694e+07	0.0678665			-/+	0.0678665	0.0842988	0.0868183	0.0796612	0.0102919
			+/-	1.16746e+07	2.40821e+07	0.484785			+/-	0.484785	1.85224	1.02787	1.12163	0.688532
			+/5ug	777699	2.20971e+07	0.0351946			+/5ug	0.0351946	0.132941	0.0356294	0.0679217	0.0563089
			+/10ug	577335	2.37426e+07	0.0243164			+/10ug	0.0243164	0.0968817	0.0210768	0.047425	0.0428614
			+/15ug	684128	2.02344e+07	0.0338101			+/15ug	0.0338101	0.104362	0.0664218	0.0681978	0.0353092						100	9
		Well2	-/-	752572	1.61363e+07	0.0466385														98	5
			-/+	1.10439e+06	1.31009e+07	0.0842988														85	3
			+/-	2.74799e+07	1.4836e+07	1.85224
			+/5ug	1.56831e+06	1.1797e+07	0.132941
			+/10ug	1.54275e+06	1.5924e+07	0.0968817
			+/15ug	1.25931e+06	1.20668e+07	0.104362
		Well3	-/-	1.39145e+06	2.7589e+07	0.0504352
			-/+	1.35531e+06	1.56109e+07	0.0868183
			+/-	2.59867e+07	2.52821e+07	1.02787
			+/5ug	558518	1.56758e+07	0.0356294
			+/10ug	306684	1.45508e+07	0.0210768
			+/15ug	514882	7.7517e+06	0.0664218
