# Supplementary material for: Solithromycin inhibits IL-13-induced goblet cell hyperplasia and MUC5AC, CLCA1, and ANO1 in human bronchial epithelial cells
Source: PeerJ. 2023 Jan 17;11:e14695. doi: 10.7717/peerj.14695 (PMC9854378; doi:10.7717/peerj.14695)
Supplement: Supplemental Information 4 [file peerj-11-14695-s004.xlsx]

## Sheet: Figure5
15min Well1/2												15min Well3/30min Well1
pErk	Name	Volume	Volume + Background	Background	Background Level	Background Type	Median Intensity	Average Intensity	Mode Intensity			ｐErk m1	Name	Volume	Volume + Background	Background	Background Level	Background Type	Median Intensity	Average Intensity	Mode Intensity			Erk m1	Name	Volume	Volume + Background	Background	Background Level	Background Type	Median Intensity	Average Intensity	Mode Intensity			GAPDH M1	Name	Volume	Volume + Background	Background	Background Level	Background Type	Median Intensity	Average Intensity	Mode Intensity
1	1	8.5633e+06	12158819	3.59552e+06	2560.91	Shape 13	7270	8660.13	6992		15min	1	1	2.66665e+06	5073206	2.40655e+06	1342.94	Shape 13	2423.5	2831.03	1579			1	1	2.42487e+07	26610522	2.36181e+06	1180.91	Shape 13	11592.5	13305.3	2679			1	1	1.89603e+07	20479389	1.51912e+06	1081.99	Shape 13	10530.5	14586.5	3120
2	2	1.41245e+07	17720011	3.59552e+06	2560.91	Shape 13	10471	12621.1	10286		Well3	2	2	4.4986e+06	6905155	2.40655e+06	1342.94	Shape 13	3065.5	3853.32	1502			2	2	3.11477e+07	33509554	2.36181e+06	1180.91	Shape 13	14097.5	16754.8	2496			2	2	1.98856e+07	21404685	1.51912e+06	1081.99	Shape 13	10363.5	15245.5	2956
3	3	1.70959e+07	20691409	3.59552e+06	2560.91	Shape 13	12502.5	14737.5	4815			3	3	6.23897e+06	8645519	2.40655e+06	1342.94	Shape 13	4046	4824.51	2473			3	3	2.52004e+07	27562241	2.36181e+06	1180.91	Shape 13	11521	13781.1	2156			3	3	1.87186e+07	20237735	1.51912e+06	1081.99	Shape 13	9859.5	14414.3	3661
4	4	7.86212e+06	11457637	3.59552e+06	2560.91	Shape 13	7100	8160.71	3003			4	4	5.89557e+06	9292418	3.39685e+06	1895.56	Shape 14	4640.5	5185.5	4744			4	4	2.31761e+07	25537876	2.36181e+06	1180.91	Shape 13	11044.5	12768.9	2056			4	4	1.79912e+07	19510356	1.51912e+06	1081.99	Shape 13	10355	13896.3	4275
5	5	1.21268e+07	15722365	3.59552e+06	2560.91	Shape 13	9197	11198.3	8865			5	5	1.21356e+07	15532444	3.39685e+06	1895.56	Shape 14	7824	8667.66	8298			5	5	1.89182e+07	21280035	2.36181e+06	1180.91	Shape 13	9219	10640	1556			5	5	1.71429e+07	18662050	1.51912e+06	1081.99	Shape 13	9675.5	13292.1	1941
6	6	1.75804e+07	21175946	3.59552e+06	2560.91	Shape 13	12621.5	15082.6	10005			6	6	1.23354e+07	15732226	3.39685e+06	1895.56	Shape 14	7699.5	8779.14	3027			6	6	1.69073e+07	19269097	2.36181e+06	1180.91	Shape 13	8379.5	9634.55	1452			6	6	1.51307e+07	16649799	1.51912e+06	1081.99	Shape 13	8883.5	11858.8	4494
7	7	9.22344e+06	12818957	3.59552e+06	2560.91	Shape 13	7959	9130.31	7718		30min	7	7	1.27714e+07	16168223	3.39685e+06	1895.56	Shape 14	7885	9022.45	2800			7	7	2.58359e+07	28197720	2.36181e+06	1180.91	Shape 13	13005.5	14098.9	2117			7	7	2.09444e+07	22463469	1.51912e+06	1081.99	Shape 13	12277.5	15999.6	2227
8	8	3.98772e+06	7583239	3.59552e+06	2560.91	Shape 13	4457.5	5401.17	4358		Well1	8	8	2.7325e+07	30721876	3.39685e+06	1895.56	Shape 14	14903.5	17143.9	15531			8	8	1.96659e+07	22027760	2.36181e+06	1180.91	Shape 13	9545	11013.9	1900			8	8	2.08882e+07	22407269	1.51912e+06	1081.99	Shape 13	12014	15959.6	2075
9	9	8.05603e+06	11651550	3.59552e+06	2560.91	Shape 13	6791.5	8298.82	6069			9	9	1.06671e+07	14063977	3.39685e+06	1895.56	Shape 14	7232.5	7848.2	2964			9	9	2.36174e+07	25979175	2.36181e+06	1180.91	Shape 13	10709.5	12989.6	1500			9	9	1.77641e+07	19283229	1.51912e+06	1081.99	Shape 13	10709	13734.5	1431
10	10	1.07493e+07	14344847	3.59552e+06	2560.91	Shape 13	8569	10217.1	7697			10	10	8.11889e+06	11515737	3.39685e+06	1895.56	Shape 14	5710.5	6426.19	3168			10	10	9.9901e+06	12351918	2.36181e+06	1180.91	Shape 13	5205.5	6175.96	1694			10	10	9.37441e+06	10893529	1.51912e+06	1081.99	Shape 13	4895	7758.92	1575
11	11	1.7032e+07	20627522	3.59552e+06	2560.91	Shape 13	12177	14692	10435			11	11	8.84731e+06	12244159	3.39685e+06	1895.56	Shape 14	6310	6832.68	2141			11	11	2.55153e+07	27877116	2.36181e+06	1180.91	Shape 13	11803.5	13938.6	12386			11	11	1.99954e+07	21514499	1.51912e+06	1081.99	Shape 13	11190.5	15323.7	2766
12	12	2.61256e+07	29721106	3.59552e+06	2560.91	Shape 13	17904.5	21168.9	15757			12	12	6.66462e+06	10061475	3.39685e+06	1895.56	Shape 14	5420.5	5614.66	2294			12	12	2.90277e+07	31389521	2.36181e+06	1180.91	Shape 13	14517	15694.8	3197			12	12	2.22987e+07	23817841	1.51912e+06	1081.99	Shape 13	12387	16964.3	20444
												30min Well
Erk	Name	Volume	Volume + Background	Background	Background Level	Background Type	Median Intensity	Average Intensity	Mode Intensity			ｐErk m2	Name	Volume	Volume + Background	Background	Background Level	Background Type	Median Intensity	Average Intensity	Mode Intensity			Erk m2	Name	Volume	Volume + Background	Background	Background Level	Background Type	Median Intensity	Average Intensity	Mode Intensity			GAPDH M2	Name	Volume	Volume + Background	Background	Background Level	Background Type	Median Intensity	Average Intensity	Mode Intensity
1	1	2.9572e+07	31661434	2.08939e+06	1138.01	Shape 13	14064	17244.8	5571		30min	1	1	9.97456e+06	14268668	4.29411e+06	2650.68	Shape 13	7943.5	8807.82	7913			1	1	5.57059e+06	7763209	2.19261e+06	1240.17	Shape 13	3837	4390.96	1491			1	1	1.28989e+07	14243928	1.345e+06	1054.08	Shape 13	7980	11163	1792
2	2	2.59714e+07	28060810	2.08939e+06	1138.01	Shape 13	13006.5	15283.7	12393		Well2	2	2	2.44576e+07	28751732	4.29411e+06	2650.68	Shape 13	14429	17748	13691			2	2	2.72583e+07	29450887	2.19261e+06	1240.17	Shape 13	14113	16657.7	8289			2	2	2.49951e+07	26340114	1.345e+06	1054.08	Shape 13	17221.5	20642.7	6139
3	3	2.55867e+07	27676043	2.08939e+06	1138.01	Shape 13	13739.5	15074.1	16016			3	3	3.00514e+07	34345506	4.29411e+06	2650.68	Shape 13	18714	21200.9	20988			3	3	2.90101e+07	31202684	2.19261e+06	1240.17	Shape 13	15183.5	17648.6	3000			3	3	1.77345e+07	19079552	1.345e+06	1054.08	Shape 13	12849.5	14952.6	4260
4	4	2.40762e+07	26165635	2.08939e+06	1138.01	Shape 13	12498.5	14251.4	12197			4	4	2.03388e+07	24632956	4.29411e+06	2650.68	Shape 13	13719	15205.5	13006			4	4	3.11466e+07	33339202	2.19261e+06	1240.17	Shape 13	16504.5	18857	16282			4	4	1.51496e+07	16494618	1.345e+06	1054.08	Shape 13	11583.5	12926.8	7634
5	5	2.72186e+07	29307989	2.08939e+06	1138.01	Shape 13	14347.5	15963	3362			5	5	1.77721e+07	22066206	4.29411e+06	2650.68	Shape 13	12924	13621.1	12924			5	5	2.9917e+07	32109581	2.19261e+06	1240.17	Shape 13	16100.5	18161.5	5596			5	5	1.50125e+07	16357463	1.345e+06	1054.08	Shape 13	11459.5	12819.3	4129
6	6	2.02875e+07	22376877	2.08939e+06	1138.01	Shape 13	10770.5	12187.8	3578			6	6	1.66024e+07	20896553	4.29411e+06	2650.68	Shape 13	11843.5	12899.1	4312			6	6	2.70132e+07	29205796	2.19261e+06	1240.17	Shape 13	13989.5	16519.1	12675			6	6	1.60996e+07	17444643	1.345e+06	1054.08	Shape 13	12101	13671.4	4003
7	7	2.87757e+07	30865121	2.08939e+06	1138.01	Shape 13	15059.5	16811.1	3441		30min	7	7	1.93639e+07	23658013	4.29411e+06	2650.68	Shape 13	11893.5	14603.7	6745			7	7	2.19158e+07	24108443	2.19261e+06	1240.17	Shape 13	11292.5	13636	9617			7	7	1.55241e+07	16869082	1.345e+06	1054.08	Shape 13	11883	13220.3	3331
8	8	2.32422e+07	25331582	2.08939e+06	1138.01	Shape 13	11914.5	13797.2	11090		Well3	8	8	1.36878e+07	17981914	4.29411e+06	2650.68	Shape 13	8541.5	11100	5000			8	8	1.56348e+07	17827452	2.19261e+06	1240.17	Shape 13	8479	10083.4	3027			8	8	1.4083e+07	15427961	1.345e+06	1054.08	Shape 13	10904	12090.9	3627
9	9	2.22992e+07	24388620	2.08939e+06	1138.01	Shape 13	11738.5	13283.6	4833			9	9	1.8684e+07	22978104	4.29411e+06	2650.68	Shape 13	11303.5	14184	10243			9	9	1.7914e+07	20106567	2.19261e+06	1240.17	Shape 13	9348	11372.5	7453			9	9	1.63375e+07	17682542	1.345e+06	1054.08	Shape 13	12901	13857.8	5086
10	10	2.91426e+07	31232018	2.08939e+06	1138.01	Shape 13	15196	17010.9	14617			10	10	1.69993e+07	21293379	4.29411e+06	2650.68	Shape 13	11563.5	13144.1	11555			10	10	2.55365e+07	27729130	2.19261e+06	1240.17	Shape 13	12838	15683.9	9179			10	10	2.05228e+07	21867854	1.345e+06	1054.08	Shape 13	15895.5	17137.8	5568
11	11	1.55934e+07	17682795	2.08939e+06	1138.01	Shape 13	8448	9631.15	6497			11	11	1.54975e+07	19791658	4.29411e+06	2650.68	Shape 13	11020.5	12217.1	10739			11	11	2.36067e+07	25799270	2.19261e+06	1240.17	Shape 13	12672.5	14592.4	11474			11	11	1.9996e+07	21340999	1.345e+06	1054.08	Shape 13	15256.5	16724.9	4210
12	12	2.92263e+07	31315657	2.08939e+06	1138.01	Shape 13	14617.5	17056.5	12063			12	12	1.2928e+07	17222120	4.29411e+06	2650.68	Shape 13	9429	10630.9	4146			12	12	1.56172e+07	17809859	2.19261e+06	1240.17	Shape 13	8571	10073.5	13142			12	12	1.80015e+07	19346492	1.345e+06	1054.08	Shape 13	13312	15161.8	3456
												15min Well3/30min Well1
pStat6	Name	Volume	Volume + Background	Background	Background Level	Background Type	Median Intensity	Average Intensity	Mode Intensity			ｐStat m1	Name	Volume	Volume + Background	Background	Background Level	Background Type	Median Intensity	Average Intensity	Mode Intensity			Stat m1	Name	Volume	Volume + Background	Background	Background Level	Background Type	Median Intensity	Average Intensity	Mode Intensity
1	1	50076	2964415	2914339	4163.34	Shape 14	4252.5	4234.88	4259		15min	1	1	-570479	2224850	2.79533e+06	2687.82	Shape 13	2139	2139.28	2156			1	1	1.10192e+07	11938901	919694	1313.85	Shape 13	16576	17055.6	6167
2	2	172001	3086340	2914339	4163.34	Shape 14	4378.5	4409.06	4379		Well3	2	2	-308675	2486654	2.79533e+06	2687.82	Shape 13	2420	2391.01	2560			2	2	1.32557e+07	14175416	919694	1313.85	Shape 13	18571.5	20250.6	5455
3	3	12241632	15155971	2914339	4163.34	Shape 14	20634	21651.4	14142			3	3	1.10961e+07	13891473	2.79533e+06	2687.82	Shape 13	10880	13357.2	4397			3	3	1.46739e+07	15593624	919694	1313.85	Shape 13	20176.5	22276.6	7069
4	4	14050622	16964961	2914339	4163.34	Shape 14	23025.5	24235.7	12254			4	4	1.15076e+07	14302959	2.79533e+06	2687.82	Shape 13	11266.5	13752.9	7835			4	4	1.33518e+07	14271537	919694	1313.85	Shape 13	19250.5	20387.9	9294
5	5	13905212	16819551	2914339	4163.34	Shape 14	23502.5	24027.9	28112			5	5	1.2851e+07	15646361	2.79533e+06	2687.82	Shape 13	12422.5	15044.6	5264			5	5	1.24573e+07	13376996	919694	1313.85	Shape 13	18015	19110	6753
6	6	11188811	14103150	2914339	4163.34	Shape 14	19549.5	20147.4	16868			6	6	1.08622e+07	13657530	2.79533e+06	2687.82	Shape 13	10759	13132.2	7018			6	6	1.05904e+07	11510117	919694	1313.85	Shape 13	15245	16443	7628
7	7	102519	3016858	2914339	4163.34	Shape 14	4313.5	4309.8	4339		30min	7	7	-132454	2662875	2.79533e+06	2687.82	Shape 13	2549	2560.46	2775			7	7	1.0597e+07	11516732	919694	1313.85	Shape 13	15268	16452.5	7151
8	8	129214	3043553	2914339	4163.34	Shape 14	4314	4347.93	4192		Well1	8	8	-149362	2645967	2.79533e+06	2687.82	Shape 13	2508.5	2544.2	2363			8	8	1.01734e+07	11093129	919694	1313.85	Shape 13	14935.5	15847.3	11811
9	9	10574519	13488858	2914339	4163.34	Shape 14	18623	19269.8	14230			9	9	1.61064e+07	18901741	2.79533e+06	2687.82	Shape 13	15591.5	18174.8	5151			9	9	1.30922e+07	14011859	919694	1313.85	Shape 13	18645	20016.9	7239
10	10	16411877	19326216	2914339	4163.34	Shape 14	27165.5	27608.9	14316			10	10	1.02508e+07	13046145	2.79533e+06	2687.82	Shape 13	10358	12544.4	3986			10	10	6.95704e+06	7876733	919694	1313.85	Shape 13	10483.5	11252.5	8040
11	11	10125270	13039609	2914339	4163.34	Shape 14	18799	18628	9109			11	11	1.5793e+07	18588310	2.79533e+06	2687.82	Shape 13	15071	17873.4	4860			11	11	1.23864e+07	13306143	919694	1313.85	Shape 13	18170.5	19008.8	9031
12	12	10887099	13801438	2914339	4163.34	Shape 14	19561.5	19716.3	12100			12	12	1.85582e+07	21353578	2.79533e+06	2687.82	Shape 13	17881.5	20532.3	7356			12	12	1.72284e+07	18148127	919694	1313.85	Shape 13	24794.5	25925.9	12414
Stat6	Name	Volume	Volume + Background	Background	Background Level	Background Type	Median Intensity	Average Intensity	Mode Intensity			ｐStat m2	Name	Volume	Volume + Background	Background	Background Level	Background Type	Median Intensity	Average Intensity	Mode Intensity			Stat m2	Name	Volume	Volume + Background	Background	Background Level	Background Type	Median Intensity	Average Intensity	Mode Intensity
1	1	1.61674e+07	17827709	1.66028e+06	1509.34	Shape 13	13187.5	16207	8249		30min	1	1	700867	3010800	2.30993e+06	2221.09	Shape 13	2907	2895	2922			1	1	3.23141e+06	4256278	1.02486e+06	1464.09	Shape 13	5813	6080.4	2188
2	2	1.73657e+07	19026004	1.66028e+06	1509.34	Shape 13	14444	17296.4	5100		Well2	2	2	759332	3069265	2.30993e+06	2221.09	Shape 13	2964.5	2951.22	2994			2	2	9.98546e+06	11010321	1.02486e+06	1464.09	Shape 13	14843	15729	11605
3	3	1.71464e+07	18806689	1.66028e+06	1509.34	Shape 13	14526.5	17097	6669			3	3	1.65552e+07	18865108	2.30993e+06	2221.09	Shape 13	15972.5	18139.5	6498			3	3	1.45358e+07	15560623	1.02486e+06	1464.09	Shape 13	21438.5	22229.5	9509
4	4	1.54867e+07	17146965	1.66028e+06	1509.34	Shape 13	13003	15588.1	5614			4	4	1.79694e+07	20279373	2.30993e+06	2221.09	Shape 13	16794.5	19499.4	8163			4	4	1.53673e+07	16392177	1.02486e+06	1464.09	Shape 13	21750	23417.4	14084
5	5	1.66039e+07	18264172	1.66028e+06	1509.34	Shape 13	13862.5	16603.8	5298			5	5	2.00606e+07	22370576	2.30993e+06	2221.09	Shape 13	18540	21510.2	5874			5	5	1.58131e+07	16837943	1.02486e+06	1464.09	Shape 13	23268.5	24054.2	15480
6	6	1.41075e+07	15767768	1.66028e+06	1509.34	Shape 13	12247.5	14334.3	8414			6	6	1.67904e+07	19100319	2.30993e+06	2221.09	Shape 13	15993.5	18365.7	6719			6	6	1.16998e+07	12724631	1.02486e+06	1464.09	Shape 13	17239	18178	5069
7	7	2.12066e+07	22866887	1.66028e+06	1509.34	Shape 13	17238.5	20788.1	5342		30min	7	7	565507	2875440	2.30993e+06	2221.09	Shape 13	2728	2764.85	2712			7	7	5.94088e+06	6965748	1.02486e+06	1464.09	Shape 13	9406	9951.07	5853
8	8	1.8842e+07	20502227	1.66028e+06	1509.34	Shape 13	15623.5	18638.4	4886		Well3	8	8	734280	3044213	2.30993e+06	2221.09	Shape 13	2936.5	2927.13	2986			8	8	7.39281e+06	8417676	1.02486e+06	1464.09	Shape 13	11178	12025.2	4489
9	9	1.451e+07	16170269	1.66028e+06	1509.34	Shape 13	12542.5	14700.2	5558			9	9	1.60466e+07	18356547	2.30993e+06	2221.09	Shape 13	15913	17650.5	8409			9	9	1.55088e+07	16533633	1.02486e+06	1464.09	Shape 13	22504.5	23619.5	12549
10	10	1.98584e+07	21518705	1.66028e+06	1509.34	Shape 13	17154	19562.5	8025			10	10	2.02897e+07	22599646	2.30993e+06	2221.09	Shape 13	18964.5	21730.4	13373			10	10	1.85703e+07	19595183	1.02486e+06	1464.09	Shape 13	26223	27993.1	24574
11	11	1.12897e+07	12949934	1.66028e+06	1509.34	Shape 13	10469	11772.7	2618			11	11	1.66578e+07	18967766	2.30993e+06	2221.09	Shape 13	16560	18238.2	7648			11	11	1.37836e+07	14808504	1.02486e+06	1464.09	Shape 13	20549	21155	12324
12	12	1.48506e+07	16510862	1.66028e+06	1509.34	Shape 13	13003	15009.9	3875			12	12	1.6362e+07	18671979	2.30993e+06	2221.09	Shape 13	16406	17953.8	5584			12	12	1.16596e+07	12684488	1.02486e+06	1464.09	Shape 13	18199.5	18120.7	10821
GAPDH	Name	Volume	Volume + Background	Background	Background Level	Background Type	Median Intensity	Average Intensity	Mode Intensity
1	1	1.90736e+07	20580635	1.50702e+06	1121.3	Shape 13	12177	15313	4192
2	2	1.33924e+07	14899393	1.50702e+06	1121.3	Shape 13	9273.5	11085.9	4551
3	3	1.28104e+07	14317392	1.50702e+06	1121.3	Shape 13	8895.5	10652.8	3510
4	4	1.22563e+07	13763350	1.50702e+06	1121.3	Shape 13	8746	10240.6	4327
5	5	1.3454e+07	14961057	1.50702e+06	1121.3	Shape 13	9430.5	11131.7	3567
6	6	1.45922e+07	16099240	1.50702e+06	1121.3	Shape 13	10172	11978.6	4990
7	7	2.06037e+07	22110686	1.50702e+06	1121.3	Shape 13	13860	16451.4	6960
8	8	1.70832e+07	18590242	1.50702e+06	1121.3	Shape 13	11708	13832	2941
9	9	1.48858e+07	16392820	1.50702e+06	1121.3	Shape 13	10696.5	12197	3056
10	10	2.1924e+07	23430992	1.50702e+06	1121.3	Shape 13	15603	17433.8	2323
11	11	1.7533e+07	19040070	1.50702e+06	1121.3	Shape 13	12138	14166.7	3137
12	12	2.3386e+07	24893007	1.50702e+06	1121.3	Shape 13	15451.5	18521.6	5029
Day0		Name	pErk	Erk	GAPDH	ｐErk/GAP	Erk/GAP	ｐErk/Erk		Day0
15min	Well1	-/-	8.5633e+06	2.9572e+07	1.90736e+07	0.448961	1.55042	0.289574
		-/+	1.41245e+07	2.59714e+07	1.33924e+07	1.05467	1.93927	0.543847		15min
		+/-	1.70959e+07	2.55867e+07	1.28104e+07	1.33454	1.99734	0.668156
		+/5ug	7.86212e+06	2.40762e+07	1.22563e+07	0.641474	1.96439	0.326551
		+/10ug	1.21268e+07	2.72186e+07	1.3454e+07	0.901354	2.02308	0.445535
		+/15ug	1.75804e+07	2.02875e+07	1.45922e+07	1.20478	1.3903	0.866565
	Well2	-/-	9.22344e+06	2.87757e+07	2.06037e+07	0.44766	1.39663	0.320528
		-/+	3.98772e+06	2.32422e+07	1.70832e+07	0.233429	1.36053	0.171572
		+/-	8.05603e+06	2.22992e+07	1.48858e+07	0.541189	1.49802	0.361269
		+/5ug	1.07493e+07	2.91426e+07	2.1924e+07	0.4903	1.32926	0.368852
		+/10ug	1.7032e+07	1.55934e+07	1.7533e+07	0.971423	0.889372	1.09226
		+/15ug	2.61256e+07	2.92263e+07	2.3386e+07	1.11715	1.24973	0.893908
	Well3	-/-	2.66665e+06	2.42487e+07	1.89603e+07	0.140644	1.27892	0.109971		Day0		pErk/Erk			Ave	SD
		-/+	4.4986e+06	3.11477e+07	1.98856e+07	0.226224	1.56635	0.144428				Well1	Well2	Well3
		+/-	6.23897e+06	2.52004e+07	1.87186e+07	0.333303	1.34628	0.247574		30min	-/-	0.494326	1.79057	0.883558	1.05615	0.665136
		+/5ug	5.89557e+06	2.31761e+07	1.79912e+07	0.327691	1.28819	0.254382			-/+	1.38946	0.897255	0.875468	1.05406	0.290668
		+/10ug	1.21356e+07	1.89182e+07	1.71429e+07	0.707906	1.10356	0.641476			+/-	0.451665	1.0359	1.04299	0.843515	0.339371
		+/15ug	1.23354e+07	1.69073e+07	1.51307e+07	0.815256	1.11742	0.729589			+/5ug	0.812693	0.653004	0.665685	0.710461	0.0887626
30min	Well1	-/-	1.27714e+07	2.58359e+07	2.09444e+07	0.609776	1.23355	0.494326			+/10ug	0.346745	0.594047	0.656491	0.532428	0.163809
		-/+	2.7325e+07	1.96659e+07	2.08882e+07	1.30816	0.941488	1.38946			+/15ug	0.229595	0.614605	0.827804	0.557335	0.303188
		+/-	1.06671e+07	2.36174e+07	1.77641e+07	0.600487	1.3295	0.451665
		+/5ug	8.11889e+06	9.9901e+06	9.37441e+06	0.866069	1.06568	0.812693
		+/10ug	8.84731e+06	2.55153e+07	1.99954e+07	0.442468	1.27606	0.346745
		+/15ug	6.66462e+06	2.90277e+07	2.22987e+07	0.298879	1.30177	0.229595
	Well2	-/-	9.97456e+06	5.57059e+06	1.28989e+07	0.773286	0.431865	1.79057
		-/+	2.44576e+07	2.72583e+07	2.49951e+07	0.978496	1.09054	0.897255
		+/-	3.00514e+07	2.90101e+07	1.77345e+07	1.69451	1.63579	1.0359
		+/5ug	2.03388e+07	3.11466e+07	1.51496e+07	1.34253	2.05593	0.653004
		+/10ug	1.77721e+07	2.9917e+07	1.50125e+07	1.18382	1.99281	0.594047
		+/15ug	1.66024e+07	2.70132e+07	1.60996e+07	1.03123	1.67787	0.614605
	Well3	-/-	1.93639e+07	2.19158e+07	1.55241e+07	1.24735	1.41173	0.883558
		-/+	1.36878e+07	1.56348e+07	1.4083e+07	0.971941	1.1102	0.875468
		+/-	1.8684e+07	1.7914e+07	1.63375e+07	1.14362	1.09649	1.04299
		+/5ug	1.69993e+07	2.55365e+07	2.05228e+07	0.828309	1.2443	0.665685
		+/10ug	1.54975e+07	2.36067e+07	1.9996e+07	0.775033	1.18057	0.656491
		+/15ug	1.2928e+07	1.56172e+07	1.80015e+07	0.718163	0.867553	0.827804
Day0		Name	pStat6	Stat6	GAPDH	ｐStat/GAP	Stat6/GAP	ｐStat/Stat6		Day0
15min	Well1	-/-	50076	1.61674e+07	1.90736e+07	0.00262541	0.847633	0.00309734
		-/+	172001	1.73657e+07	1.33924e+07	0.0128432	1.29669	0.00990462		15min
		+/-	12241632	1.71464e+07	1.28104e+07	0.955603	1.33848	0.713947
		+/5ug	14050622	1.54867e+07	1.22563e+07	1.1464	1.26357	0.907271
		+/10ug	13905212	1.66039e+07	1.3454e+07	1.03353	1.23412	0.837467
		+/15ug	11188811	1.41075e+07	1.45922e+07	0.766766	0.966782	0.793111
	Well2	-/-	102519	2.12066e+07	2.06037e+07	0.00497577	1.02926	0.00483429
		-/+	129214	1.8842e+07	1.70832e+07	0.0075638	1.10295	0.00685778
		+/-	10574519	1.451e+07	1.48858e+07	0.710376	0.974754	0.728775
		+/5ug	16411877	1.98584e+07	2.1924e+07	0.748581	0.905786	0.826444
		+/10ug	10125270	1.12897e+07	1.7533e+07	0.577496	0.643907	0.896862
		+/15ug	10887099	1.48506e+07	2.3386e+07	0.465539	0.635021	0.733109
	Well3	-/-	-570479	1.10192e+07	1.89603e+07	-0.0300881	0.581173	-0.0517713		Day0		ｐStat/GAP			Ave	SD
		-/+	-308675	1.32557e+07	1.98856e+07	-0.0155225	0.6666	-0.0232861				Well1	Well2	Well3
		+/-	1.10961e+07	1.46739e+07	1.87186e+07	0.592786	0.783922	0.756181		30min	-/-	-0.0124991	0.216892	0.0951891	0.0998606	0.114767
		+/5ug	1.15076e+07	1.33518e+07	1.79912e+07	0.639624	0.74213	0.861876			-/+	-0.0146815	0.0760438	0.0993235	0.0535619	0.0602359
		+/10ug	1.2851e+07	1.24573e+07	1.71429e+07	0.74964	0.726673	1.03161			+/-	1.23023	1.13893	1.03468	1.13461	0.0978478
		+/15ug	1.08622e+07	1.05904e+07	1.51307e+07	0.717892	0.69993	1.02566			+/5ug	1.47345	1.16933	1.09259	1.24512	0.201423
30min	Well1	-/-	-132454	1.0597e+07	2.09444e+07	-0.00632407	0.505962	-0.0124991			+/10ug	1.27502	1.26861	1.20852	1.25072	0.036683
		-/+	-149362	1.01734e+07	2.08882e+07	-0.00715054	0.487043	-0.0146815			+/15ug	1.07719	1.4351	1.40331	1.3052	0.198104
		+/-	1.61064e+07	1.30922e+07	1.77641e+07	0.906683	0.737001	1.23023
		+/5ug	1.02508e+07	6.95704e+06	9.37441e+06	1.09349	0.742131	1.47345
		+/10ug	1.5793e+07	1.23864e+07	1.99954e+07	0.789831	0.619465	1.27502
		+/15ug	1.85582e+07	1.72284e+07	2.22987e+07	0.832256	0.77262	1.07719
	Well2	-/-	700867	3.23141e+06	1.28989e+07	0.0543353	0.250518	0.216892
		-/+	759332	9.98546e+06	2.49951e+07	0.0303792	0.399496	0.0760438
		+/-	1.65552e+07	1.45358e+07	1.77345e+07	0.933499	0.81963	1.13893
		+/5ug	1.79694e+07	1.53673e+07	1.51496e+07	1.18613	1.01437	1.16933
		+/10ug	2.00606e+07	1.58131e+07	1.50125e+07	1.33627	1.05333	1.26861
		+/15ug	1.67904e+07	1.16998e+07	1.60996e+07	1.0429	0.72671	1.4351
	Well3	-/-	565507	5.94088e+06	1.55241e+07	0.0364277	0.382688	0.0951891
		-/+	734280	7.39281e+06	1.4083e+07	0.0521396	0.524947	0.0993235
		+/-	1.60466e+07	1.55088e+07	1.63375e+07	0.982193	0.949272	1.03468
		+/5ug	2.02897e+07	1.85703e+07	2.05228e+07	0.98864	0.904861	1.09259
		+/10ug	1.66578e+07	1.37836e+07	1.9996e+07	0.833058	0.68932	1.20852
		+/15ug	1.6362e+07	1.16596e+07	1.80015e+07	0.908927	0.647703	1.40331
